# Supplementary material for: Moisture and temperature effects on the radiocarbon signature of respired carbon dioxide to assess stability of soil carbon in the Tibetan Plateau
Source: Copernicus journal article supplement (doi:10.5194/bg-21-1277-2024), 2024-03-18
Supplement: Supplementary file 1 [file Lab_results.xlsx]

## Sheet: Lab
						Pre-incubation					Post-incubation
		temperature	moisture	Db (bulk density) taken from Mina	Incubation duration (day)	∆14C (‰) bulk soil (averaged from 5 measurements in each ecosystem)	Ctotal (average from 5 samples) %	Corg-total (average from 5 samples) %	Cinorg-total (average from 5 samples) %	Ntotal (average from 5 samples) %	Ctotal (bulk each sample) %	Corg-total (bulk each sample) %	Cinorg-total (bulk each sample) %	Ntotal (bulk each sample) %	∆14CO2 (‰) gas	∆14C (‰) bulk soil		Incubated g soil	Days flux	CO2 respiration (mg CO2/day)	CO2 respiration (mg CO2/g soil/day)	Mean CO2 respiration (mg CO2/g soil/day)	sigma
TT-1-20-95	Set 1	20	95	1.3	19	-55.52	3.16	3.12	0.05	0.26	4.17	4.10959	0.0616994	0.286245	56.8	46.7		11.112	19.0625	0.419369	0.0377402	0.04361	0.00851707
TT-3-20-95		20	95	1.3	32	-55.52	3.16	3.12	0.05	0.26	4.81	4.7681	0.0465378	0.320706	53.6	51.7		10.594	19.0625	0.565493	0.0533786
TT-4-20-95		20	95	1.3	19	-55.52	3.16	3.12	0.05	0.26	4.6	4.56802	0.0363905	0.297189	56.9	69.2		12.192	19.0625	0.48416	0.0397113
TT-1-20-60		20	60	1.3	19	-55.52	3.16	3.12	0.05	0.26	4.1	4.06312	0.0374341	0.294414	51.8	35.9		11.854	18.9167	0.331439	0.0279601	0.0279236	0.0025321
TT-2-20-60		20	60	1.3	19	-55.52	3.16	3.12	0.05	0.26	3.88	3.84545	0.0323657	0.284211	29.9	27.6		11.882	18.9167	0.296019	0.0249133
TT-3-20-60		20	60	1.3	19	-55.52	3.16	3.12	0.05	0.26	4.07	4.03837	0.0323474	0.29517	24.5	38.7		11.784	18.9167	0.366553	0.031106
TT-4-20-60		20	60	1.3	19	-55.52	3.16	3.12	0.05	0.26	4.01	3.97613	0.0323262	0.283865	63.7	57		11.693	18.9167	0.324072	0.027715
TT-1-15-95		15	95	1.3	30	-55.52	3.16	3.12	0.05	0.26	4.06	4.0301	0.0333317	0.296955	61.3	42.6		11.482	15.1458	0.208001	0.0181154	0.0232406	0.00399489
TT-2-15-95		15	95	1.3	15	-55.52	3.16	3.12	0.05	0.26	4.38	4.33882	0.0424186	0.292891	61.2	21.1		12.666	15.1458	0.349753	0.0276135
TT-3-15-95		15	95	1.3	30	-55.52	3.16	3.12	0.05	0.26	4.38	4.3453	0.0394017	0.283894	45.6	58.1		11.96	15.1458	0.269898	0.0225667
TT-4-15-95		15	95	1.3	30	-55.52	3.16	3.12	0.05	0.26	3.75	3.70783	0.0373305	0.270394	83.4	73.9		11.709	15.1458	0.288822	0.0246667
TT-1-15-60		15	60	1.3	30	-55.52	3.16	3.12	0.05	0.26	3.66	3.5979	0.058568	0.272644	55.6	24.5		12.835	15.1458	0.21401	0.0166739	0.0161362	0.00257778
TT-2-15-60		15	60	1.3	30	-55.52	3.16	3.12	0.05	0.26	3.28	3.25048	0.033302	0.269444	13.9	23		11.779	15.1458	0.158108	0.0134229
TT-3-15-60		15	60	1.3	30	-55.52	3.16	3.12	0.05	0.26	3.56	3.52436	0.0333058	0.268465	20.3	29.5		11.416	15.1458	0.171208	0.0149972
TT-4-15-60		15	60	1.3	30	-55.52	3.16	3.12	0.05	0.26	3.81	3.77709	0.0323087	0.282701	51	39.8		10.793	15.1458	0.209932	0.0194508
TT-Blank-20		20			19										-984.6
TT-1-10-95	Set 2	10	95	1.3	66	-55.52	3.16	3.12	0.05	0.26	3.55974	2.60923	0.950517	0.26143	74.5	30.7		13.401	60.125	0.13159	0.00981941	0.0110785	0.0012994
TT-3-10-95		10	95	1.3	66	-55.52	3.16	3.12	0.05	0.26	4.56534	3.52374	1.0416	0.313455	61.7	62.8		13.102	60.125	0.144139	0.0110013
TT-5-10-95		10	95	1.3	66	-55.52	3.16	3.12	0.05	0.26	3.8091	2.75034	1.05876	0.279346	40.5	40		13.362	60.125	0.165886	0.0124148
TT-1-10-60		10	60	1.3	66	-55.52	3.16	3.12	0.05	0.26	3.53457	2.63011	0.904454	0.257841	56.7	49.6		13.407	60.125	0.0932987	0.00695895	0.0074979	0.000562557
TT-2-10-60		10	60	1.3	66	-55.52	3.16	3.12	0.05	0.26	3.84461	2.83122	1.01339	0.27581	68.6	73.4		13.43	60.125	0.100613	0.0074917
TT-3-10-60		10	60	1.3	66	-55.52	3.16	3.12	0.05	0.26	3.7204	2.81456	0.905835	0.271546	-105.1	35.6		13.359	60.125	0.0895981	0.00670695
TT-4-10-60		10	60	1.3	66	-55.52	3.16	3.12	0.05	0.26	3.58547	2.58365	1.00182	0.267151	48.1	29		13.255	60.125	0.102423	0.00772711
TT-5-10-60		10	60	1.3	66	-55.52	3.16	3.12	0.05	0.26	4.30711	3.28125	1.02586	0.293978	47.9	46.9		13.345	60.125	0.107129	0.00802763
TT-6-10-60		10	60	1.3	66	-55.52	3.16	3.12	0.05	0.26	3.99982	3.06147	0.938348	0.282882	-227.1	35.5		13.132	60.125	0.106042	0.00807505
TT-Blank-10		10			66										-967.2
TT-1-5-95		5	95	1.3	67	-55.52	3.16	3.12	0.05	0.26	4.42432	3.48467	0.939647	0.305653	52.1	38.8		13.35	60.125	0.0765307	0.00573264	0.00522913	0.000311351
TT-2-5-95		5	95	1.3	67	-55.52	3.16	3.12	0.05	0.26	4.2377	3.19919	1.03851	0.301812	48.9	28.4		13.465	60.125	0.0715919	0.00531689
TT-3-5-95		5	95	1.3	67	-55.52	3.16	3.12	0.05	0.26	4.38902	3.41404	0.97498	0.299886	51.2	55.4		13.35	60.125	0.0662069	0.00495932
TT-4-5-95		5	95	1.3	67	-55.52	3.16	3.12	0.05	0.26	3.92916	2.77669	1.15247	0.281473	51.2	38.7		13.38	60.125	0.068245	0.00510052
TT-5-5-95		5	95	1.3	67	-55.52	3.16	3.12	0.05	0.26	4.45302	3.34568	1.10733	0.297159	57.1	62.8		13.405	60.125	0.0675111	0.00503627
TT-1-5-60		5	60	1.3	67	-55.52	3.16	3.12	0.05	0.26	3.87928	2.90032	0.978956	0.253218	56.4	42.3		13.46	60.125	0.0543603	0.00403866	0.00360459	0.000757423
TT-3-5-60		5	60	1.3	67	-55.52	3.16	3.12	0.05	0.26	4.45693	3.57849	0.87844	0.317349	67.8	50.4		13.451	60.125	0.0386271	0.00287169
TT-4-5-60		5	60	1.3	67	-55.52	3.16	3.12	0.05	0.26	3.63601	2.57812	1.05789	0.272535	38.8	36.7		13.369	60.125	0.0409691	0.00306449
TT-5-5-60		5	60	1.3	67	-55.52	3.16	3.12	0.05	0.26	3.69503	2.66032	1.03471	0.272591	53.4	34.5		13.235	60.125	0.0588099	0.00444352
TT-Blank-5		5			67										-985.8
Peat-1-20-95	Set 3	20	95	0.27	13	-75.24	27.69	27.62	0.06	1.78	28.6768	28.1868	0.49	1.83098	-7.5	-77.3		13.262	6.688	5.57109	0.420079	0.462189	0.031876
Peat-2-20-95		20	95	0.27	13	-75.24	27.69	27.62	0.06	1.78	29.0541	28.5641	0.49	1.85558	3.5	-60.9		13.226	6.688	6.38831	0.483012
Peat-3-20-95		20	95	0.27	13	-75.24	27.69	27.62	0.06	1.78	29.8828	29.3928	0.49	1.91267	-12	-69.8		12.955	6.688	6.5072	0.502293
Peat-4-20-95		20	95	0.27	13	-75.24	27.69	27.62	0.06	1.78	30.3962	29.9062	0.49	1.90851	-1.5	-82		12.623	6.688	5.63964	0.446775
Peat-5-20-95		20	95	0.27	13	-75.24	27.69	27.62	0.06	1.78	30.3036	29.8136	0.49	1.90868	-6.5	-79.2		13.267	6.688	6.0867	0.458785
Peat-2-20-60		20	60	0.27	13	-75.24	27.69	27.62	0.06	1.78	28.9688	28.4788	0.49	1.82192	13.6	-67.1		13.113	6.688	4.50695	0.343701	0.336513	0.014022
Peat-3-20-60		20	60	0.27	13	-75.24	27.69	27.62	0.06	1.78	28.6505	28.1605	0.49	1.79777	4.8	-78.5		13.161	6.688	4.28998	0.325962
Peat-4-20-60		20	60	0.27	13	-75.24	27.69	27.62	0.06	1.78	28.3706	27.8806	0.49	1.81052	4.2	-79.2		12.788	6.688	4.13926	0.323683
Peat-5-20-60		20	60	0.27	13	-75.24	27.69	27.62	0.06	1.78	28.9664	28.4764	0.49	1.84955	-2	-80.1		12.78	6.688	4.50759	0.352707
Peat-Blank-20		20			13										-964
Peat-1-15-95		15	95	0.27	13	-75.24	27.69	27.62	0.06	1.78	28.6905	28.2005	0.49	1.80807	-0.2	-81.9		13.487	6.688	3.8818	0.287818	0.298902	0.00722936
Peat-2-15-95		15	95	0.27	13	-75.24	27.69	27.62	0.06	1.78	28.2163	27.7263	0.49	1.80101	-20.9	-77.3		13.113	6.688	3.93876	0.300371
Peat-3-15-95		15	95	0.27	13	-75.24	27.69	27.62	0.06	1.78	28.8549	28.3649	0.49	1.82636	-2	-82.7		13.208	6.688	3.97102	0.300652
Peat-4-15-95		15	95	0.27	13	-75.24	27.69	27.62	0.06	1.78	26.4143	25.9243	0.49	1.72198	1.7	-70.4		13.489	6.688	4.01748	0.297834
Peat-5-15-95		15	95	0.27	13	-75.24	27.69	27.62	0.06	1.78	28.3058	27.8158	0.49	1.78416	-5.5	-80		12.98	6.688	3.99572	0.307837
Peat-1-15-60		15	60	0.27	13	-75.24	27.69	27.62	0.06	1.78	28.9342	28.4442	0.49	1.83257	13.5	-78.2		13.099	6.688	2.78069	0.212283	0.212075	0.00365177
Peat-3-15-60		15	60	0.27	13	-75.24	27.69	27.62	0.06	1.78	28.0179	27.5279	0.49	1.81245	4.4	-69.7		12.747	6.688	2.6555	0.208324
Peat-4-15-60		15	60	0.27	13	-75.24	27.69	27.62	0.06	1.78	28.579	28.089	0.49	1.80392	10	-80		12.78	6.688	2.7556	0.215618
Peat-Blank-15		15			13										-985
Peat-1-10-95	Set 4	10	95	0.27	13	-75.24	27.69	27.62	0.06	1.78	28.9867	28.4967	0.49	1.83337	8.8	-73.6		13.179	8.813	2.32682	0.176555	0.189493	0.0102963
Peat-2-10-95		10	95	0.27	13	-75.24	27.69	27.62	0.06	1.78	28.9137	28.4237	0.49	1.84687	11.8	-74.7		13.445	8.813	2.75317	0.204773
Peat-3-10-95		10	95	0.27	13	-75.24	27.69	27.62	0.06	1.78	28.7846	28.2946	0.49	1.85641	13.9	-76.6		13.451	8.813	2.5779	0.191651
Peat-4-10-95		10	95	0.27	13	-75.24	27.69	27.62	0.06	1.78	28.8423	28.3523	0.49	1.84039	23.3	-70.7		13.466	8.813	2.54905	0.189296
Peat-5-10-95		10	95	0.27	13	-75.24	27.69	27.62	0.06	1.78	28.5064	28.0164	0.49	1.82452	6.1	-76.1		13.431	8.813	2.4873	0.185191
Peat-1-10-60		10	60	0.27	13	-75.24	27.69	27.62	0.06	1.78	28.8217	28.3317	0.49	1.83364	10.5	-79.3		13.321	8.813	1.16158	0.0871989	0.121331	0.0203426
Peat2-10-60		10	60	0.27	13	-75.24	27.69	27.62	0.06	1.78	28.7739	28.2839	0.49	1.84018	13.4	-74		13.298	8.813	1.5758	0.118499
Peat-3-10-60		10	60	0.27	13	-75.24	27.69	27.62	0.06	1.78	29.206	28.716	0.49	1.84229	13.3	-82.8		13.266	8.813	1.80267	0.135886
Peat-4-10-60		10	60	0.27	13	-75.24	27.69	27.62	0.06	1.78	28.1677	27.6777	0.49	1.83407	23.9	-180.8		13.479	8.813	1.82837	0.135646
Peat-5-10-60		10	60	0.27	13	-75.24	27.69	27.62	0.06	1.78	28.7604	28.2704	0.49	1.84905	-0.9	-79.9		13.387	8.813	1.7326	0.129424
TT-Blank-10		10			13										-983.5
Peat-1-5-95		5	95	0.27	13	-75.24	27.69	27.62	0.06	1.78	28.0891	27.5991	0.49	1.80659	-9.8	-74.8		13.314	6.979	0.787993	0.0591853	0.0613592	0.00356383
Peat-2-5-95		5	95	0.27	13	-75.24	27.69	27.62	0.06	1.78	29.0505	28.5605	0.49	1.84059	1.3	-81.1		12.87	6.979	0.827615	0.0643058
Peat-4-5-95		5	95	0.27	13	-75.24	27.69	27.62	0.06	1.78	28.7494	28.2594	0.49	1.82455	0.9	-83		13.216	6.979	0.759659	0.0574803
Peat-5-5-95		5	95	0.27	13	-75.24	27.69	27.62	0.06	1.78	29.0407	28.5507	0.49	1.83953	-1	-78.8		12.559	6.979	0.809621	0.0644654
Peat-1-5-60		5	60	0.27	13	-75.24	27.69	27.62	0.06	1.78	28.8786	28.3886	0.49	1.82921	1.3	-85.9		13.466	6.979	0.540222	0.0401175	0.0403251	0.000820354
Peat-2-5-60		5	60	0.27	13	-75.24	27.69	27.62	0.06	1.78	28.9285	28.4385	0.49	1.84295	1.8	-79		13.066	6.979	0.520761	0.0398562
Peat-3-5-60		5	60	0.27	13	-75.24	27.69	27.62	0.06	1.78	28.7601	28.2701	0.49	1.8357	8.4	-79.5		13.325	6.979	0.537997	0.040375
Peat-4-5-60		5	60	0.27	13	-75.24	27.69	27.62	0.06	1.78	28.5846	28.0946	0.49	1.82914	11.1	-79.1		13.464	6.979	0.561374	0.0416944
Peat-5-5-60		5	60	0.27	13	-75.24	27.69	27.62	0.06	1.78	28.8544	28.3644	0.49	1.83673	8.3	-81.7		13.072	6.979	0.517423	0.0395825
Peat-Blank-5		5			13										-988.7
