# Supplementary material for: Moisture and temperature effects on the radiocarbon signature of respired carbon dioxide to assess stability of soil carbon in the Tibetan Plateau
Source: Copernicus journal article supplement (doi:10.5194/bg-21-1277-2024), 2024-03-18
Supplement: Supplementary file [file bg-21-1277-2024-supplement-title-page.pdf › bg-21-1277-2024-supplement-title-page.pdf]

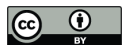

## *Supplement of*

# **Moisture and temperature effects on the radiocarbon signature of respired carbon dioxide to assess stability of soil carbon in the Tibetan Plateau**

**Andrés Tangarife-Escobar et al.**

*Correspondence to:* Andrés Tangarife-Escobar (atanga@bgc-jena.mpg.de)

- bg-21-1277-2024-supplement-title-page.pdf
- README.rtf
- Raw\_Data
  - .DS\_Store
  - AllData.csv
  - Grassland.csv
  - Lab\_results.csv
  - Lab\_results.xlsx
  - Peatland.csv
  - Lab\_results.xlsx
- Scripts
  - .DS\_Store
  - FigureA7\_curves.Rmd
  - Figures\_Grassland.Rmd
  - Figures\_Peatland.Rmd
  - Hua2021.rda

The copyright of individual parts of the supplement might differ from the article licence.
